# Supplementary material for: Ablation of Stromal Cells with a Targeted Proapoptotic Peptide Suppresses Cancer Chemotherapy Resistance and Metastasis
Source: PubMed Central journal article supplement — Mol Ther Oncolytics. 2020 Aug 25;18:579–86. doi: 10.1016/j.omto.2020.08.012 (PMC7501461; doi:10.1016/j.omto.2020.08.012), 2020-08-25

**OMTO, Volume 18**

**Supplemental Information**

**Ablation of Stromal Cells with a Targeted  
Proapoptotic Peptide Suppresses Cancer  
Chemotherapy Resistance and Metastasis**

**Fei Su, Xiaoping Wang, Troy Pearson, Jangsoon Lee, Savitri Krishnamurthy, Naoto T. Ueno, and Mikhail G. Kolonin**

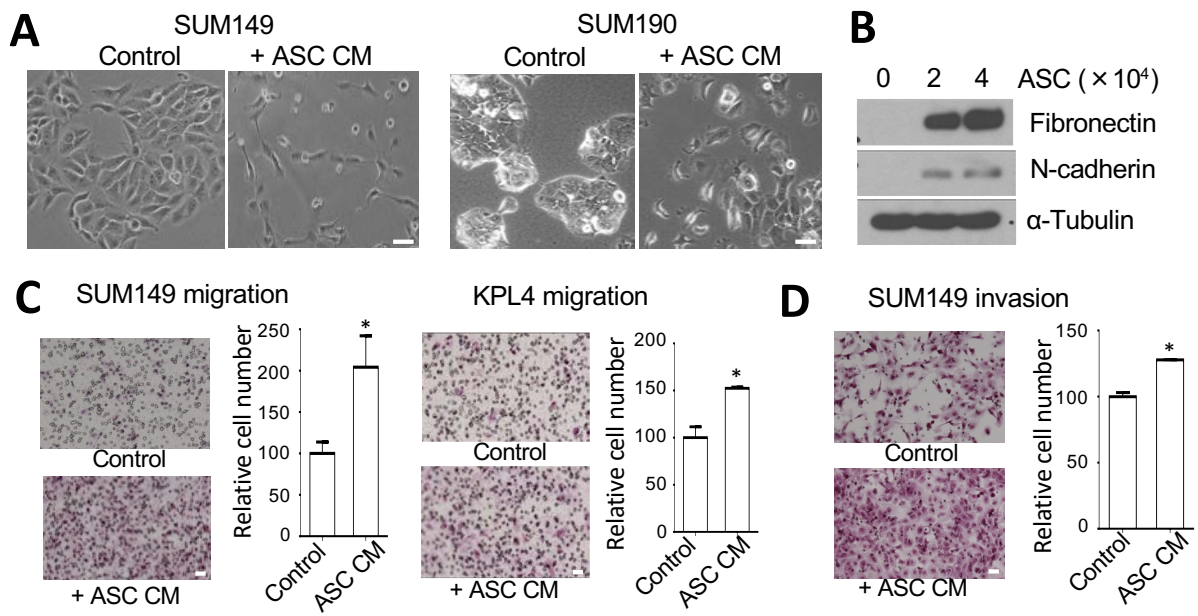

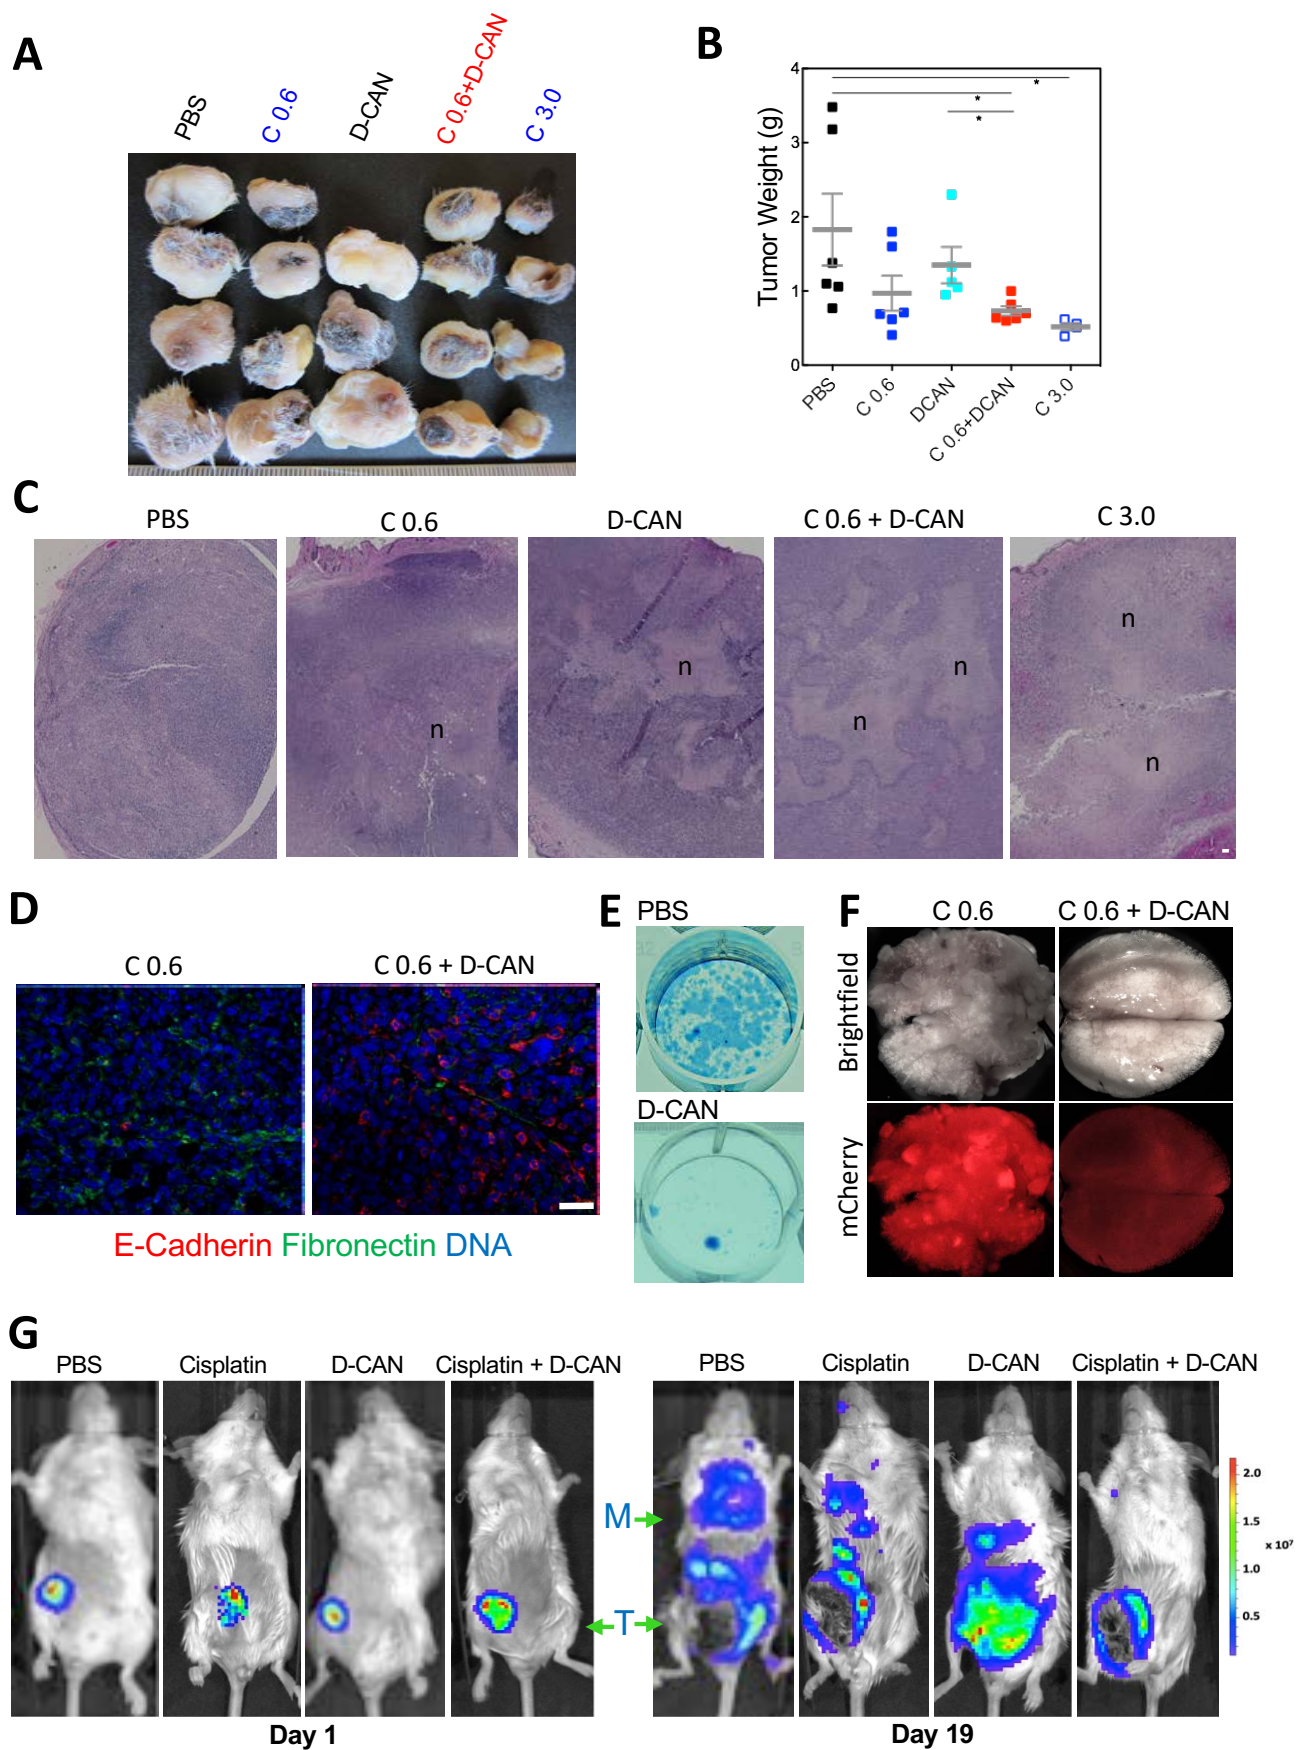

Supplement: mmc1.pdf [file mmc1.pdf]
